# Supplementary material for: Efficacy of Treprostinil in Neonates with Congenital Diaphragmatic Hernia Complicated by Severe Pulmonary Arterial Hypertension
Source: Research Square preprint supplement (doi:10.21203/rs.3.rs-7851583/v1), 2025-11-03
Supplement: Supplementary file 1 [file 29d1dae4a6e88892d6db23f6.docx]

**Table 1. Baseline Characteristics of 67 Neonates with CDH and Severe Pulmonary Hypertension**

| **Characteristic** | **Case Number (n, %)** | **Mean ± Standard Deviation** |
| --- | --- | --- |
| Total participants (n) | 67 | - |
| Gender |  |  |
| Male | 40（59.70） | - |
| Female | 27（40.30） | - |
| Gestational age at birth (weeks) |  | 37.44 1.44 |
| Birth weight (kg) |  | 2.93 0.55 |
| Side of hernia |  |  |
| Left | 49（73.13） | - |
| Right | 18（26.87） | - |
| Surgical approach |  |  |
| Open surgery | 12（17.91） |  |
| Thoracoscopic surgery | 35（52.24） |  |
| Thoracoscopic-to-open conversion | 10（14.93） |  |
| No surgery | 10（14.93） |  |
| Bochdalek classification | A 0（00.00）  B 31（54.39）  C 19（33.33）  D 7 （12.28） |  |

Table 2. Comparison of Echocardiographic Parameters Before and 24 Hours After Treprostinil Administration

| **Indicator** | **Time Point** | **x̄ ± SD or M (Q1, Q3)** | **95% Confidence Interval (CI)** | **Test Statistic (t/Z)** | **p Value** |
| --- | --- | --- | --- | --- | --- |
| △SiO₂ (%) | Before | 21.00 2.76 | 3.19 – 5.29 | t = 8.05 | < 0.001 |
| After | 16.76 4.95 |
| PDA (mm) | Before | 4.5 1.30 | 0.47 – 1.20 | t = 4.581 | < 0.001 |
| After | 3.67 1.54 |
| PFO (mm) | Before | 2.0 [0.0, 2.6] | - | Z = -4004 | < 0.001 |
| After | 0.0 [0.0, 0.0] |
| ASD (mm) | Before | 2.3 [2.0, 2.8] | - | Z = -1.887 | 0.059 |
| After | 0.0 [0.0, 0.0] |
| TRV (cm/s) | Before | 385.01 56.17 | 30.30 – 71.31 | t = 4.95 | < 0.001 |
| After | 334.21 71.76 |
| TVP (mmHg) | Before | 59.82 16.25 | 7.95 – 17.931 | t = 5.18 | < 0.001 |
| After | 46.88 16.68 |

*Note: x̄ ± SD = mean ± standard deviation; M = median; Q1 = first quartile; Q3 = third quartile; △SiO₂ = preductal-postductal oxygen saturation difference; PDA = patent ductus arteriosus; PFO = patent foramen ovale; ASD = atrial septal defect; TRV = peak tricuspid regurgitation velocity; TVP = tricuspid regurgitation pressure.*

**Table 3. Dynamic Changes in Main Echocardiographic Indicators in 50 Postoperative Survivors**

| **Measurement Indicator** | **24 Hours Postoperatively** | **72 Hours Postoperatively** | **1 Week Postoperatively** | **2 Weeks Postoperatively** |
| --- | --- | --- | --- | --- |
| **（M [Q1，Q3]）** | 11.5 [2.5,15] | 0 [0,5] | 0 [0,0] | 0 [0,0] |
| **PDA**  **（M [Q1，Q3]）** | 3.5 [2.0,4.6] | 2.0 [2.0,4.0] | 2.5 [0,4.5] | 0 [0,4] |
| **PFO**  **（ SD）** | 2.016 0.8132 | 1.884 0.916 | 1.631 0.985 | 1.564 1.029 |
| **TRV**  **（M [Q1，Q3]）** | 318 [293,381] | 302 [236.5,351] | 239 [0,296.5] | 0 [0,284.5] |
| **TVP**  **（M [Q1，Q3]）** | 40 [34,54] | 36 [22,49] | 23 [0,35] | 0 [0,32.25] |

*Note: x̄ = mean; SD = standard deviation; M = median; Q1 = first quartile; Q3 = third quartile; △SiO₂ = preductal-postductal oxygen saturation difference; PDA = patent ductus arteriosus; PFO = patent foramen ovale; TRV = peak tricuspid regurgitation velocity; TVP = tricuspid regurgitation pressure.*

**Table 4. Time and Causes of Death in 7 Postoperative Non-Survivors**

| **Gender** | **Postoperative Death Time (Days)** | **PFO Status (Diameter, mm)** | **Cause of Death** |
| --- | --- | --- | --- |
| Male | 3 | Persistent (2.4) | Pulmonary hemorrhage, respiratory failure |
| Female | 0 | Closed | Preoperative incarcerated hernia, postoperative right heart failure |
| Male | 2 | Closed | Pulmonary hemorrhage, respiratory failure |
| Female | 1 | Persistent (1.8) | Concurrent tracheal stenosis, persistent hypoxemia |
| Male | 4 | Closed | Preoperative persistent acidosis, complicated with acute renal insufficiency, no significant PAH reduction |
| Male | 3 | Closed | Aggravated pulmonary infection, persistent PAH |
| Female | 3 | Closed | Pulmonary hemorrhage, respiratory failure |

**Table 5. Comparison of Echocardiographic Parameters Between Non-Survivor and Survivor Groups**

| **Time Point** | **Indicator** | **Non-Survivor Group [M (Q1, Q3)]** | **Survivor Group [M (Q1, Q3)]** | **Z Value** | **p Value** |
| --- | --- | --- | --- | --- | --- |
| Preoperative(Before treprostinil) |  | 21.5  [16.25, 23] | 20  [20, 22.75] | -0.031 | 0.975 |
| PDA | 2.9  [3.4, 5.6] | 4.6  [4, 5.5] | -0.903 | 0.367 |
| PFO | 0  [0, 1.8] | 2  [0, 2.7] | -2.276 | 0.023 |
| TRV | 396  [341, 450] | 380  [344, 422] | -0.1 | 0.92 |
| TVP | 62  [46, 81] | 56  [47, 71] | -0.167 | 0.867 |
| Postoperative(After treprostinil) |  | 20.5  [12.5, 21] | 16  [15, 20] | -1.233 | 0.218 |
| PDA | 4  [3.2, 4] | 3.5  [2.3, 4.8] | -0.379 | 0.705 |
| PFO | 2  [2, 2.4] | 2.2  [0, 2.8] | -0.484 | 0.629 |
| TRV | 386  [321, 415] | 325  [286, 380] | -1.224 | 0.221 |
| TVP | 60  [40, 68] | 44  [33, 56] | -1.247 | 0.213 |
| 24 Hours Postoperatively |  | 16  [14，19] | 11.5  [2.5, 15] | -0.382 | 0.326 |
| PDA | 4.5  [3, 5.2] | 3.5  [2.0, 4.6] | -1.427 | 0.153 |
| PFO | 2.2  [2, 2.7] | 2.016 0.8132 | -1.422 | 0.155 |
| TRV | 377  [310, 412] | 318  [293, 381] | -1.869 | 0.062 |
| TVP | 51  [38, 65] | 40  [34, 54] | -1.447 | 0.148 |
| 72 Hours Postoperatively |  | 15  [13，17] | 0  [0, 5] | -0.189 | 0.112 |
| PDA | 4.3  [2.6, 5.7] | 2.0  [2.0, 4.0] | -1.86 | 0.063 |
| PFO | 1.9  [0.0, 5.75] | 1.884 0.916 | -0.705 | 0.481 |
| TRV | 382  [341, 413.25] | 302  [236.5, 351] | -2.501 | 0.012 |
| TVP | 49.5  [34.25, 65.75] | 36  [22, 49] | -1.595 | 0.111 |

*Note: △SiO₂ = preductal-postductal oxygen saturation difference; PDA = patent ductus arteriosus; PFO = patent foramen ovale; TRV = peak tricuspid regurgitation velocity; TVP = tricuspid regurgitation pressure; M = median; Q1 = first quartile; Q3 = third quartile.*
